# Supplementary material for: Germline pathogenic variants identification through Comprehensive Cancer Genome Profiling
Source: Research Square preprint supplement (doi:10.21203/rs.3.rs-8088663/v1), 2025-12-08
Supplement: Supplementary file 2 [file 75b525cfae7d33f81b2ffaaf.pdf]

### Supplementary figure 3. Distribution Of All Constitutional Variants by Gene

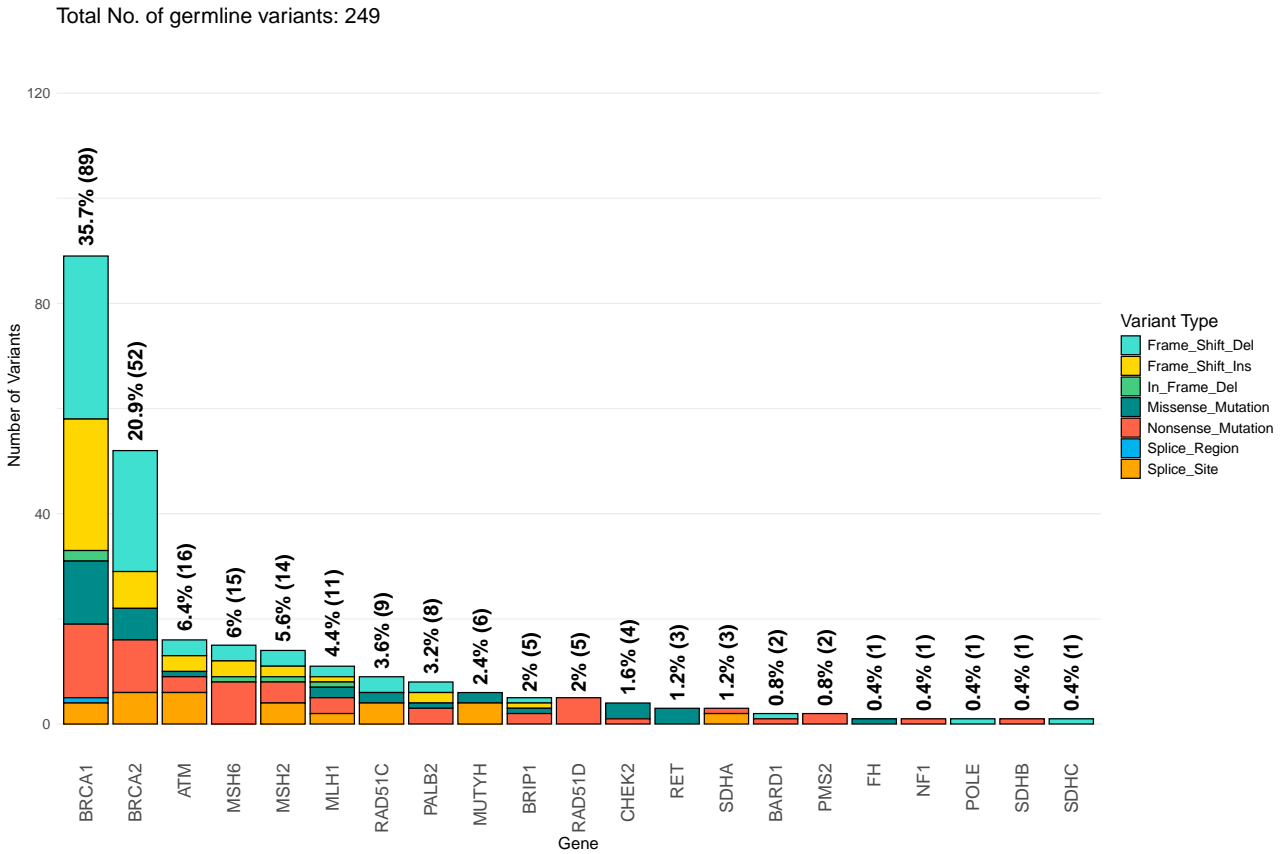

This figure shows the number of constitutional variants detected in the most frequently mutated genes across multiple cancer types. The x-axis lists the most frequently mutated genes, while the y-axis represents the total number of detected constitutional variants considering all the neoplasms. Bars are color-coded to indicate the different variant types, as shown in the legend on the right. Each bar is stacked to reflect the contribution of each variant type to the total variant count for a given gene. At the top of each bar, the percentage of the total number of variants for the corresponding gene relative to the overall total of 249 constitutional variants is displayed in black. The total number of variants for every gene is also reported in brackets.
