# Supplementary material for: Germline pathogenic variants identification through Comprehensive Cancer Genome Profiling
Source: Research Square preprint supplement (doi:10.21203/rs.3.rs-8088663/v1), 2025-12-08
Supplement: Supplementary file 3 [file 81297847d5828b400c802c79.pdf]

**Supplementary Table 1a** Suspected constitutional pathogenic variants according to tumor type and gene involved with an indication to genetic testing - Ovary

|                | Variants with indication to genetic counseling | Variants with no clinical indication to perform germline test | Variants tested in leukocyte DNA |           |               |
|----------------|------------------------------------------------|---------------------------------------------------------------|----------------------------------|-----------|---------------|
|                |                                                |                                                               | All variants                     | Confirmed | Not confirmed |
|                | n=265                                          | n=15                                                          | n=233                            | n=172     | n=61          |
| Gene           |                                                |                                                               |                                  |           |               |
| <i>ATM</i>     | 8                                              | 1                                                             | 7                                | 5         | 2             |
| <i>BAP1</i>    | 0                                              | 0                                                             | 0                                | 0         | 0             |
| <i>BARD1</i>   | 2                                              | 0                                                             | 1                                | 1         | 0             |
| <i>BRCA1</i>   | 114                                            | 0                                                             | 111                              | 81        | 30            |
| <i>BRCA2</i>   | 61                                             | 0                                                             | 58                               | 44        | 14            |
| <i>BRIP1</i>   | 6                                              | 0                                                             | 5                                | 4         | 1             |
| <i>CHEK2</i>   | 3                                              | 0                                                             | 3                                | 2         | 1             |
| <i>DICER1</i>  | 3                                              | 2                                                             | 1                                | 0         | 1             |
| <i>FH</i>      | 0                                              | 0                                                             | 0                                | 0         | 0             |
| <i>FLCN</i>    | 0                                              | 0                                                             | 0                                | 0         | 0             |
| <i>MLH1</i>    | 6                                              | 0                                                             | 6                                | 4         | 2             |
| <i>MSH2</i>    | 4                                              | 0                                                             | 4                                | 1         | 3             |
| <i>MSH6</i>    | 9                                              | 0                                                             | 7                                | 4         | 3             |
| <i>MUTYH</i>   | 2                                              | 0                                                             | 2                                | 2         | 0             |
| <i>NF1</i>     | 9                                              | 8                                                             | 0                                | 0         | 0             |
| <i>PALB2</i>   | 7                                              | 0                                                             | 6                                | 6         | 0             |
| <i>PMS2</i>    | 1                                              | 0                                                             | 1                                | 1         | 0             |
| <i>POLD1</i>   | 1                                              | 0                                                             | 0                                | 0         | 0             |
| <i>POLE</i>    | 3                                              | 1                                                             | 2                                | 1         | 1             |
| <i>PTCH1</i>   | 3                                              | 2                                                             | 0                                | 0         | 0             |
| <i>PTEN</i>    | 1                                              | 0                                                             | 1                                | 0         | 1             |
| <i>RAD51C</i>  | 11                                             | 0                                                             | 9                                | 8         | 1             |
| <i>RAD51D</i>  | 4                                              | 0                                                             | 4                                | 4         | 0             |
| <i>RET</i>     | 2                                              | 1                                                             | 1                                | 1         | 0             |
| <i>SDHA</i>    | 2                                              | 0                                                             | 2                                | 2         | 0             |
| <i>SDHB</i>    | 2                                              | 0                                                             | 2                                | 1         | 1             |
| <i>SDHC</i>    | 0                                              | 0                                                             | 0                                | 0         | 0             |
| <i>SMAD3</i>   | 0                                              | 0                                                             | 0                                | 0         | 0             |
| <i>SMARCB1</i> | 1                                              | 0                                                             | 0                                | 0         | 0             |
| <i>TSC2</i>    | 0                                              | 0                                                             | 0                                | 0         | 0             |

Results are presented as n (%) except where indicated.

**Supplementary Table 1b** Suspected constitutional pathogenic variants according to tumor type and gene involved with an indication to genetic testing - Endometrium

|                | Variants with indication<br>to genetic counseling | Variants with no clinical<br>indication to perform<br>germline test | Variants tested in leukocyte DNA |           |               |
|----------------|---------------------------------------------------|---------------------------------------------------------------------|----------------------------------|-----------|---------------|
|                |                                                   |                                                                     | All variants                     | Confirmed | Not confirmed |
|                | n=147                                             | n=8                                                                 | n=99                             | n=48      | n=51          |
| Gene           |                                                   |                                                                     |                                  |           |               |
| <i>ATM</i>     | 27                                                | 1                                                                   | 12                               | 4         | 8             |
| <i>BAP1</i>    | 0                                                 | 0                                                                   | 0                                | 0         | 0             |
| <i>BARD1</i>   | 3                                                 | 1                                                                   | 1                                | 0         | 1             |
| <i>BRCA1</i>   | 6                                                 | 0                                                                   | 5                                | 3         | 2             |
| <i>BRCA2</i>   | 16                                                | 0                                                                   | 9                                | 4         | 5             |
| <i>BRIP1</i>   | 3                                                 | 0                                                                   | 3                                | 1         | 2             |
| <i>CHEK2</i>   | 9                                                 | 0                                                                   | 5                                | 1         | 4             |
| <i>DICER1</i>  | 6                                                 | 2                                                                   | 3                                | 0         | 3             |
| <i>FH</i>      | 0                                                 | 0                                                                   | 0                                | 0         | 0             |
| <i>FLCN</i>    | 0                                                 | 0                                                                   | 0                                | 0         | 0             |
| <i>MLH1</i>    | 9                                                 | 0                                                                   | 9                                | 3         | 6             |
| <i>MSH2</i>    | 25                                                | 0                                                                   | 23                               | 13        | 10            |
| <i>MSH6</i>    | 19                                                | 0                                                                   | 14                               | 11        | 3             |
| <i>MUTYH</i>   | 4                                                 | 0                                                                   | 4                                | 4         | 0             |
| <i>NF1</i>     | 1                                                 | 1                                                                   | 0                                | 0         | 0             |
| <i>PALB2</i>   | 2                                                 | 0                                                                   | 1                                | 1         | 0             |
| <i>PMS2</i>    | 1                                                 | 0                                                                   | 1                                | 1         | 0             |
| <i>POLD1</i>   | 1                                                 | 0                                                                   | 0                                | 0         | 0             |
| <i>POLE</i>    | 2                                                 | 0                                                                   | 2                                | 0         | 2             |
| <i>PTCH1</i>   | 9                                                 | 3                                                                   | 4                                | 0         | 4             |
| <i>PTEN</i>    | 1                                                 | 0                                                                   | 1                                | 0         | 1             |
| <i>RAD51C</i>  | 0                                                 | 0                                                                   | 0                                | 0         | 0             |
| <i>RAD51D</i>  | 1                                                 | 0                                                                   | 1                                | 1         | 0             |
| <i>RET</i>     | 0                                                 | 0                                                                   | 0                                | 0         | 0             |
| <i>SDHA</i>    | 1                                                 | 0                                                                   | 1                                | 1         | 0             |
| <i>SDHB</i>    | 0                                                 | 0                                                                   | 0                                | 0         | 0             |
| <i>SDHC</i>    | 1                                                 | 0                                                                   | 0                                | 0         | 0             |
| <i>SMAD3</i>   | 0                                                 | 0                                                                   | 0                                | 0         | 0             |
| <i>SMARCB1</i> | 0                                                 | 0                                                                   | 0                                | 0         | 0             |
| <i>TSC2</i>    | 0                                                 | 0                                                                   | 0                                | 0         | 0             |

Results are presented as n (%) except where indicated.

**Supplementary Table 1c** Suspected constitutional pathogenic variants according to tumor type and gene involved with an indication to genetic testing - Lung

|                | Variants with indication<br>to genetic counseling | Variants with no clinical<br>indication to perform<br>germline test | Variants tested in leukocyte DNA |           |               |
|----------------|---------------------------------------------------|---------------------------------------------------------------------|----------------------------------|-----------|---------------|
|                |                                                   |                                                                     | All variants                     | Confirmed | Not confirmed |
|                | n=45                                              | n=5                                                                 | n=14                             | n=6       | n=8           |
| Gene           |                                                   |                                                                     |                                  |           |               |
| <i>ATM</i>     | 11                                                | 0                                                                   | 4                                | 3         | 1             |
| <i>BAP1</i>    | 1                                                 | 0                                                                   | 0                                | 0         | 0             |
| <i>BARD1</i>   | 1                                                 | 0                                                                   | 0                                | 0         | 0             |
| <i>BRCA1</i>   | 5                                                 | 0                                                                   | 3                                | 2         | 1             |
| <i>BRCA2</i>   | 6                                                 | 0                                                                   | 3                                | 1         | 2             |
| <i>BRIP1</i>   | 0                                                 | 0                                                                   | 0                                | 0         | 0             |
| <i>CHEK2</i>   | 2                                                 | 1                                                                   | 1                                | 0         | 1             |
| <i>DICER1</i>  | 0                                                 | 0                                                                   | 0                                | 0         | 0             |
| <i>FH</i>      | 0                                                 | 0                                                                   | 0                                | 0         | 0             |
| <i>FLCN</i>    | 0                                                 | 0                                                                   | 0                                | 0         | 0             |
| <i>MLH1</i>    | 1                                                 | 0                                                                   | 1                                | 0         | 1             |
| <i>MSH2</i>    | 0                                                 | 0                                                                   | 0                                | 0         | 0             |
| <i>MSH6</i>    | 2                                                 | 0                                                                   | 1                                | 0         | 1             |
| <i>MUTYH</i>   | 0                                                 | 0                                                                   | 0                                | 0         | 0             |
| <i>NF1</i>     | 6                                                 | 3                                                                   | 0                                | 0         | 0             |
| <i>PALB2</i>   | 3                                                 | 0                                                                   | 0                                | 0         | 0             |
| <i>PMS2</i>    | 0                                                 | 0                                                                   | 0                                | 0         | 0             |
| <i>POLD1</i>   | 1                                                 | 0                                                                   | 0                                | 0         | 0             |
| <i>POLE</i>    | 0                                                 | 0                                                                   | 0                                | 0         | 0             |
| <i>PTCH1</i>   | 0                                                 | 0                                                                   | 0                                | 0         | 0             |
| <i>PTEN</i>    | 0                                                 | 0                                                                   | 0                                | 0         | 0             |
| <i>RAD51C</i>  | 2                                                 | 0                                                                   | 0                                | 0         | 0             |
| <i>RAD51D</i>  | 1                                                 | 0                                                                   | 1                                | 0         | 1             |
| <i>RET</i>     | 0                                                 | 0                                                                   | 0                                | 0         | 0             |
| <i>SDHA</i>    | 0                                                 | 0                                                                   | 0                                | 0         | 0             |
| <i>SDHB</i>    | 1                                                 | 0                                                                   | 0                                | 0         | 0             |
| <i>SDHC</i>    | 0                                                 | 0                                                                   | 0                                | 0         | 0             |
| <i>SMAD3</i>   | 1                                                 | 0                                                                   | 0                                | 0         | 0             |
| <i>SMARCB1</i> | 0                                                 | 0                                                                   | 0                                | 0         | 0             |
| <i>TSC2</i>    | 1                                                 | 1                                                                   | 0                                | 0         | 0             |

Results are presented as n (%) except where indicated.

**Supplementary Table 1d** Suspected constitutional pathogenic variants according to tumor type and gene involved with an indication to genetic testing - Colorectum

|                | Variants with indication<br>to genetic counseling | Variants with no clinical<br>indication to perform<br>germline test | Variants tested in leukocyte DNA |           |               |
|----------------|---------------------------------------------------|---------------------------------------------------------------------|----------------------------------|-----------|---------------|
|                |                                                   |                                                                     | All variants                     | Confirmed | Not confirmed |
|                | n=26                                              | n=4                                                                 | n=10                             | n=5       | n=5           |
| Gene           |                                                   |                                                                     |                                  |           |               |
| <i>ATM</i>     | 4                                                 | 0                                                                   | 1                                | 0         | 1             |
| <i>BAP1</i>    | 0                                                 | 0                                                                   | 0                                | 0         | 0             |
| <i>BARD1</i>   | 2                                                 | 1                                                                   | 0                                | 0         | 0             |
| <i>BRCA1</i>   | 0                                                 | 0                                                                   | 0                                | 0         | 0             |
| <i>BRCA2</i>   | 4                                                 | 1                                                                   | 2                                | 1         | 1             |
| <i>BRIP1</i>   | 3                                                 | 0                                                                   | 0                                | 0         | 0             |
| <i>CHEK2</i>   | 3                                                 | 1                                                                   | 1                                | 0         | 1             |
| <i>DICER1</i>  | 0                                                 | 0                                                                   | 0                                | 0         | 0             |
| <i>FH</i>      | 0                                                 | 0                                                                   | 0                                | 0         | 0             |
| <i>FLCN</i>    | 1                                                 | 0                                                                   | 1                                | 0         | 1             |
| <i>MLH1</i>    | 5                                                 | 0                                                                   | 5                                | 4         | 1             |
| <i>MSH2</i>    | 0                                                 | 0                                                                   | 0                                | 0         | 0             |
| <i>MSH6</i>    | 0                                                 | 0                                                                   | 0                                | 0         | 0             |
| <i>MUTYH</i>   | 0                                                 | 0                                                                   | 0                                | 0         | 0             |
| <i>NF1</i>     | 0                                                 | 0                                                                   | 0                                | 0         | 0             |
| <i>PALB2</i>   | 0                                                 | 0                                                                   | 0                                | 0         | 0             |
| <i>PMS2</i>    | 0                                                 | 0                                                                   | 0                                | 0         | 0             |
| <i>POLD1</i>   | 0                                                 | 0                                                                   | 0                                | 0         | 0             |
| <i>POLE</i>    | 0                                                 | 0                                                                   | 0                                | 0         | 0             |
| <i>PTCH1</i>   | 1                                                 | 1                                                                   | 0                                | 0         | 0             |
| <i>PTEN</i>    | 0                                                 | 0                                                                   | 0                                | 0         | 0             |
| <i>RAD51C</i>  | 0                                                 | 0                                                                   | 0                                | 0         | 0             |
| <i>RAD51D</i>  | 0                                                 | 0                                                                   | 0                                | 0         | 0             |
| <i>RET</i>     | 0                                                 | 0                                                                   | 0                                | 0         | 0             |
| <i>SDHA</i>    | 0                                                 | 0                                                                   | 0                                | 0         | 0             |
| <i>SDHB</i>    | 0                                                 | 0                                                                   | 0                                | 0         | 0             |
| <i>SDHC</i>    | 0                                                 | 0                                                                   | 0                                | 0         | 0             |
| <i>SMAD3</i>   | 3                                                 | 0                                                                   | 0                                | 0         | 0             |
| <i>SMARCB1</i> | 0                                                 | 0                                                                   | 0                                | 0         | 0             |
| <i>TSC2</i>    | 0                                                 | 0                                                                   | 0                                | 0         | 0             |

Results are presented as n (%) except where indicated.

**Supplementary Table 1e** Suspected constitutional pathogenic variants according to tumor type and gene involved with an indication to genetic testing - Pancreas

|                | Variants with indication<br>to genetic counseling | Variants with no clinical<br>indication to perform<br>germline test | Variants tested in leukocyte DNA |           |               |
|----------------|---------------------------------------------------|---------------------------------------------------------------------|----------------------------------|-----------|---------------|
|                |                                                   |                                                                     | All variants                     | Confirmed | Not confirmed |
| Gene           | n=14                                              | n=0                                                                 | n=10                             | n=9       | n=1           |
| <i>ATM</i>     | 5                                                 | 0                                                                   | 3                                | 3         | 0             |
| <i>BAP1</i>    | 0                                                 | 0                                                                   | 0                                | 0         | 0             |
| <i>BARD1</i>   | 1                                                 | 0                                                                   | 1                                | 1         | 0             |
| <i>BRCA1</i>   | 1                                                 | 0                                                                   | 1                                | 1         | 0             |
| <i>BRCA2</i>   | 4                                                 | 0                                                                   | 2                                | 2         | 0             |
| <i>BRIP1</i>   | 0                                                 | 0                                                                   | 0                                | 0         | 0             |
| <i>CHEK2</i>   | 0                                                 | 0                                                                   | 0                                | 0         | 0             |
| <i>DICER1</i>  | 0                                                 | 0                                                                   | 0                                | 0         | 0             |
| <i>FH</i>      | 1                                                 | 0                                                                   | 1                                | 1         | 0             |
| <i>FLCN</i>    | 0                                                 | 0                                                                   | 0                                | 0         | 0             |
| <i>MLH1</i>    | 0                                                 | 0                                                                   | 0                                | 0         | 0             |
| <i>MSH2</i>    | 0                                                 | 0                                                                   | 0                                | 0         | 0             |
| <i>MSH6</i>    | 1                                                 | 0                                                                   | 1                                | 0         | 1             |
| <i>MUTYH</i>   | 0                                                 | 0                                                                   | 0                                | 0         | 0             |
| <i>NF1</i>     | 0                                                 | 0                                                                   | 0                                | 0         | 0             |
| <i>PALB2</i>   | 1                                                 | 0                                                                   | 1                                | 1         | 0             |
| <i>PMS2</i>    | 0                                                 | 0                                                                   | 0                                | 0         | 0             |
| <i>POLD1</i>   | 0                                                 | 0                                                                   | 0                                | 0         | 0             |
| <i>POLE</i>    | 0                                                 | 0                                                                   | 0                                | 0         | 0             |
| <i>PTCH1</i>   | 0                                                 | 0                                                                   | 0                                | 0         | 0             |
| <i>PTEN</i>    | 0                                                 | 0                                                                   | 0                                | 0         | 0             |
| <i>RAD51C</i>  | 0                                                 | 0                                                                   | 0                                | 0         | 0             |
| <i>RAD51D</i>  | 0                                                 | 0                                                                   | 0                                | 0         | 0             |
| <i>RET</i>     | 0                                                 | 0                                                                   | 0                                | 0         | 0             |
| <i>SDHA</i>    | 0                                                 | 0                                                                   | 0                                | 0         | 0             |
| <i>SDHB</i>    | 0                                                 | 0                                                                   | 0                                | 0         | 0             |
| <i>SDHC</i>    | 0                                                 | 0                                                                   | 0                                | 0         | 0             |
| <i>SMAD3</i>   | 0                                                 | 0                                                                   | 0                                | 0         | 0             |
| <i>SMARCB1</i> | 0                                                 | 0                                                                   | 0                                | 0         | 0             |
| <i>TSC2</i>    | 0                                                 | 0                                                                   | 0                                | 0         | 0             |

Results are presented as n (%) except where indicated.

**Supplementary Table 1f** Suspected constitutional pathogenic variants according to tumor type and gene involved with an indication to genetic testing - Cholangiocarcinoma

|                | Variants with indication<br>to genetic counseling | Variants with no clinical<br>indication to perform<br>germline test | Variants tested in leukocyte DNA |           |               |
|----------------|---------------------------------------------------|---------------------------------------------------------------------|----------------------------------|-----------|---------------|
|                |                                                   |                                                                     | All variants                     | Confirmed | Not confirmed |
| Gene           | n=7                                               | n=0                                                                 | n=3                              | n=1       | n=2           |
| <i>ATM</i>     | 1                                                 | 0                                                                   | 0                                | 0         | 0             |
| <i>BAP1</i>    | 3                                                 | 0                                                                   | 2                                | 0         | 2             |
| <i>BARD1</i>   | 0                                                 | 0                                                                   | 0                                | 0         | 0             |
| <i>BRCA1</i>   | 1                                                 | 0                                                                   | 1                                | 1         | 0             |
| <i>BRCA2</i>   | 1                                                 | 0                                                                   | 0                                | 0         | 0             |
| <i>BRIP1</i>   | 0                                                 | 0                                                                   | 0                                | 0         | 0             |
| <i>CHEK2</i>   | 0                                                 | 0                                                                   | 0                                | 0         | 0             |
| <i>DICER1</i>  | 1                                                 | 0                                                                   | 0                                | 0         | 0             |
| <i>FH</i>      | 0                                                 | 0                                                                   | 0                                | 0         | 0             |
| <i>FLCN</i>    | 0                                                 | 0                                                                   | 0                                | 0         | 0             |
| <i>MLH1</i>    | 0                                                 | 0                                                                   | 0                                | 0         | 0             |
| <i>MSH2</i>    | 0                                                 | 0                                                                   | 0                                | 0         | 0             |
| <i>MSH6</i>    | 0                                                 | 0                                                                   | 0                                | 0         | 0             |
| <i>MUTYH</i>   | 0                                                 | 0                                                                   | 0                                | 0         | 0             |
| <i>NF1</i>     | 0                                                 | 0                                                                   | 0                                | 0         | 0             |
| <i>PALB2</i>   | 0                                                 | 0                                                                   | 0                                | 0         | 0             |
| <i>PMS2</i>    | 0                                                 | 0                                                                   | 0                                | 0         | 0             |
| <i>POLD1</i>   | 0                                                 | 0                                                                   | 0                                | 0         | 0             |
| <i>POLE</i>    | 0                                                 | 0                                                                   | 0                                | 0         | 0             |
| <i>PTCH1</i>   | 0                                                 | 0                                                                   | 0                                | 0         | 0             |
| <i>PTEN</i>    | 0                                                 | 0                                                                   | 0                                | 0         | 0             |
| <i>RAD51C</i>  | 0                                                 | 0                                                                   | 0                                | 0         | 0             |
| <i>RAD51D</i>  | 0                                                 | 0                                                                   | 0                                | 0         | 0             |
| <i>RET</i>     | 0                                                 | 0                                                                   | 0                                | 0         | 0             |
| <i>SDHA</i>    | 0                                                 | 0                                                                   | 0                                | 0         | 0             |
| <i>SDHB</i>    | 0                                                 | 0                                                                   | 0                                | 0         | 0             |
| <i>SDHC</i>    | 0                                                 | 0                                                                   | 0                                | 0         | 0             |
| <i>SMAD3</i>   | 0                                                 | 0                                                                   | 0                                | 0         | 0             |
| <i>SMARCB1</i> | 0                                                 | 0                                                                   | 0                                | 0         | 0             |
| <i>TSC2</i>    | 0                                                 | 0                                                                   | 0                                | 0         | 0             |

Results are presented as n (%) except where indicated.

**Supplementary Table 1g** Suspected constitutional pathogenic variants according to tumor type and gene involved with an indication to genetic testing - Melanoma

|                | Variants with indication<br>to genetic counseling | Variants with no clinical<br>indication to perform<br>germline test | Variants tested in leukocyte DNA |           |               |
|----------------|---------------------------------------------------|---------------------------------------------------------------------|----------------------------------|-----------|---------------|
|                |                                                   |                                                                     | All variants                     | Confirmed | Not confirmed |
|                | n=7                                               | n=0                                                                 | n=2                              | n=1       | n=1           |
| Gene           |                                                   |                                                                     |                                  |           |               |
| <i>ATM</i>     | 2                                                 | 0                                                                   | 0                                | 0         | 0             |
| <i>BAP1</i>    | 0                                                 | 0                                                                   | 0                                | 0         | 0             |
| <i>BARD1</i>   | 0                                                 | 0                                                                   | 0                                | 0         | 0             |
| <i>BRCA1</i>   | 1                                                 | 0                                                                   | 1                                | 1         | 0             |
| <i>BRCA2</i>   | 1                                                 | 0                                                                   | 1                                | 0         | 1             |
| <i>BRIP1</i>   | 0                                                 | 0                                                                   | 0                                | 0         | 0             |
| <i>CHEK2</i>   | 0                                                 | 0                                                                   | 0                                | 0         | 0             |
| <i>DICER1</i>  | 0                                                 | 0                                                                   | 0                                | 0         | 0             |
| <i>FH</i>      | 0                                                 | 0                                                                   | 0                                | 0         | 0             |
| <i>FLCN</i>    | 0                                                 | 0                                                                   | 0                                | 0         | 0             |
| <i>MLH1</i>    | 0                                                 | 0                                                                   | 0                                | 0         | 0             |
| <i>MSH2</i>    | 0                                                 | 0                                                                   | 0                                | 0         | 0             |
| <i>MSH6</i>    | 0                                                 | 0                                                                   | 0                                | 0         | 0             |
| <i>MUTYH</i>   | 0                                                 | 0                                                                   | 0                                | 0         | 0             |
| <i>NF1</i>     | 2                                                 | 0                                                                   | 0                                | 0         | 0             |
| <i>PALB2</i>   | 0                                                 | 0                                                                   | 0                                | 0         | 0             |
| <i>PMS2</i>    | 0                                                 | 0                                                                   | 0                                | 0         | 0             |
| <i>POLD1</i>   | 0                                                 | 0                                                                   | 0                                | 0         | 0             |
| <i>POLE</i>    | 0                                                 | 0                                                                   | 0                                | 0         | 0             |
| <i>PTCH1</i>   | 0                                                 | 0                                                                   | 0                                | 0         | 0             |
| <i>PTEN</i>    | 0                                                 | 0                                                                   | 0                                | 0         | 0             |
| <i>RAD51C</i>  | 0                                                 | 0                                                                   | 0                                | 0         | 0             |
| <i>RAD51D</i>  | 0                                                 | 0                                                                   | 0                                | 0         | 0             |
| <i>RET</i>     | 0                                                 | 0                                                                   | 0                                | 0         | 0             |
| <i>SDHA</i>    | 0                                                 | 0                                                                   | 0                                | 0         | 0             |
| <i>SDHB</i>    | 0                                                 | 0                                                                   | 0                                | 0         | 0             |
| <i>SDHC</i>    | 0                                                 | 0                                                                   | 0                                | 0         | 0             |
| <i>SMAD3</i>   | 0                                                 | 0                                                                   | 0                                | 0         | 0             |
| <i>SMARCB1</i> | 1                                                 | 0                                                                   | 0                                | 0         | 0             |
| <i>TSC2</i>    | 0                                                 | 0                                                                   | 0                                | 0         | 0             |

Results are presented as n (%) except where indicated.

**Supplementary Table 1h** Suspected constitutional pathogenic variants according to tumor type and gene involved with an indication to genetic testing - Prostate

|                | Variants with indication to genetic counseling | Variants with no clinical indication to perform germline test | Variants tested in leukocyte DNA |           |               |
|----------------|------------------------------------------------|---------------------------------------------------------------|----------------------------------|-----------|---------------|
|                |                                                |                                                               | All variants                     | Confirmed | Not confirmed |
|                | n=8                                            | n=0                                                           | n=4                              | n=3       | n=1           |
| Gene           |                                                |                                                               |                                  |           |               |
| <i>ATM</i>     | 3                                              | 0                                                             | 1                                | 1         | 0             |
| <i>BAP1</i>    | 0                                              | 0                                                             | 0                                | 0         | 0             |
| <i>BARD1</i>   | 0                                              | 0                                                             | 0                                | 0         | 0             |
| <i>BRCA1</i>   | 0                                              | 0                                                             | 0                                | 0         | 0             |
| <i>BRCA2</i>   | 3                                              | 0                                                             | 1                                | 0         | 1             |
| <i>BRIP1</i>   | 0                                              | 0                                                             | 0                                | 0         | 0             |
| <i>CHEK2</i>   | 1                                              | 0                                                             | 1                                | 1         | 0             |
| <i>DICER1</i>  | 0                                              | 0                                                             | 0                                | 0         | 0             |
| <i>FH</i>      | 0                                              | 0                                                             | 0                                | 0         | 0             |
| <i>FLCN</i>    | 0                                              | 0                                                             | 0                                | 0         | 0             |
| <i>MLH1</i>    | 0                                              | 0                                                             | 0                                | 0         | 0             |
| <i>MSH2</i>    | 0                                              | 0                                                             | 0                                | 0         | 0             |
| <i>MSH6</i>    | 0                                              | 0                                                             | 0                                | 0         | 0             |
| <i>MUTYH</i>   | 0                                              | 0                                                             | 0                                | 0         | 0             |
| <i>NF1</i>     | 0                                              | 0                                                             | 0                                | 0         | 0             |
| <i>PALB2</i>   | 0                                              | 0                                                             | 0                                | 0         | 0             |
| <i>PMS2</i>    | 0                                              | 0                                                             | 0                                | 0         | 0             |
| <i>POLD1</i>   | 0                                              | 0                                                             | 0                                | 0         | 0             |
| <i>POLE</i>    | 0                                              | 0                                                             | 0                                | 0         | 0             |
| <i>PTCH1</i>   | 0                                              | 0                                                             | 0                                | 0         | 0             |
| <i>PTEN</i>    | 0                                              | 0                                                             | 0                                | 0         | 0             |
| <i>RAD51C</i>  | 1                                              | 0                                                             | 1                                | 1         | 0             |
| <i>RAD51D</i>  | 0                                              | 0                                                             | 0                                | 0         | 0             |
| <i>RET</i>     | 0                                              | 0                                                             | 0                                | 0         | 0             |
| <i>SDHA</i>    | 0                                              | 0                                                             | 0                                | 0         | 0             |
| <i>SDHB</i>    | 0                                              | 0                                                             | 0                                | 0         | 0             |
| <i>SDHC</i>    | 0                                              | 0                                                             | 0                                | 0         | 0             |
| <i>SMAD3</i>   | 0                                              | 0                                                             | 0                                | 0         | 0             |
| <i>SMARCB1</i> | 0                                              | 0                                                             | 0                                | 0         | 0             |
| <i>TSC2</i>    | 0                                              | 0                                                             | 0                                | 0         | 0             |

Results are presented as n (%) except where indicated.



**Supplementary Table 1h** Suspected constitutional pathogenic variants according to tumor type and gene involved with an indication to genetic testing - Melanoma

|                | Variants with indication<br>to genetic counseling | Variants with no clinical<br>indication to perform<br>germline test | Variants tested in leukocyte DNA |           |               |
|----------------|---------------------------------------------------|---------------------------------------------------------------------|----------------------------------|-----------|---------------|
|                |                                                   |                                                                     | All variants                     | Confirmed | Not confirmed |
|                | n=7                                               | n=0                                                                 | n=2                              | n=1       | n=1           |
| Gene           |                                                   |                                                                     |                                  |           |               |
| <i>ATM</i>     | 2                                                 | 0                                                                   | 0                                | 0         | 0             |
| <i>BAP1</i>    | 0                                                 | 0                                                                   | 0                                | 0         | 0             |
| <i>BARD1</i>   | 0                                                 | 0                                                                   | 0                                | 0         | 0             |
| <i>BRCA1</i>   | 1                                                 | 0                                                                   | 1                                | 1         | 0             |
| <i>BRCA2</i>   | 1                                                 | 0                                                                   | 1                                | 0         | 1             |
| <i>BRIP1</i>   | 0                                                 | 0                                                                   | 0                                | 0         | 0             |
| <i>CHEK2</i>   | 0                                                 | 0                                                                   | 0                                | 0         | 0             |
| <i>DICER1</i>  | 0                                                 | 0                                                                   | 0                                | 0         | 0             |
| <i>FH</i>      | 0                                                 | 0                                                                   | 0                                | 0         | 0             |
| <i>FLCN</i>    | 0                                                 | 0                                                                   | 0                                | 0         | 0             |
| <i>MLH1</i>    | 0                                                 | 0                                                                   | 0                                | 0         | 0             |
| <i>MSH2</i>    | 0                                                 | 0                                                                   | 0                                | 0         | 0             |
| <i>MSH6</i>    | 0                                                 | 0                                                                   | 0                                | 0         | 0             |
| <i>MUTYH</i>   | 0                                                 | 0                                                                   | 0                                | 0         | 0             |
| <i>NF1</i>     | 2                                                 | 0                                                                   | 0                                | 0         | 0             |
| <i>PALB2</i>   | 0                                                 | 0                                                                   | 0                                | 0         | 0             |
| <i>PMS2</i>    | 0                                                 | 0                                                                   | 0                                | 0         | 0             |
| <i>POLD1</i>   | 0                                                 | 0                                                                   | 0                                | 0         | 0             |
| <i>POLE</i>    | 0                                                 | 0                                                                   | 0                                | 0         | 0             |
| <i>PTCH1</i>   | 0                                                 | 0                                                                   | 0                                | 0         | 0             |
| <i>PTEN</i>    | 0                                                 | 0                                                                   | 0                                | 0         | 0             |
| <i>RAD51C</i>  | 0                                                 | 0                                                                   | 0                                | 0         | 0             |
| <i>RAD51D</i>  | 0                                                 | 0                                                                   | 0                                | 0         | 0             |
| <i>RET</i>     | 0                                                 | 0                                                                   | 0                                | 0         | 0             |
| <i>SDHA</i>    | 0                                                 | 0                                                                   | 0                                | 0         | 0             |
| <i>SDHB</i>    | 0                                                 | 0                                                                   | 0                                | 0         | 0             |
| <i>SDHC</i>    | 0                                                 | 0                                                                   | 0                                | 0         | 0             |
| <i>SMAD3</i>   | 0                                                 | 0                                                                   | 0                                | 0         | 0             |
| <i>SMARCB1</i> | 1                                                 | 0                                                                   | 0                                | 0         | 0             |
| <i>TSC2</i>    | 0                                                 | 0                                                                   | 0                                | 0         | 0             |

Results are presented as n (%) except where indicated.

**Supplementary Table 1i** Suspected constitutional pathogenic variants according to tumor type and gene involved with an indication to genetic testing - Thyroid

|                | Variants with indication<br>to genetic counseling | Variants with no clinical<br>indication to perform<br>germline test | Variants tested in leukocyte DNA |           |               |
|----------------|---------------------------------------------------|---------------------------------------------------------------------|----------------------------------|-----------|---------------|
|                |                                                   |                                                                     | All variants                     | Confirmed | Not confirmed |
| Gene           | n=4                                               | n=0                                                                 | n=3                              | n=2       | n=1           |
| <i>ATM</i>     | 0                                                 | 0                                                                   | 0                                | 0         | 0             |
| <i>BAP1</i>    | 0                                                 | 0                                                                   | 0                                | 0         | 0             |
| <i>BARD1</i>   | 0                                                 | 0                                                                   | 0                                | 0         | 0             |
| <i>BRCA1</i>   | 0                                                 | 0                                                                   | 0                                | 0         | 0             |
| <i>BRCA2</i>   | 0                                                 | 0                                                                   | 0                                | 0         | 0             |
| <i>BRIP1</i>   | 0                                                 | 0                                                                   | 0                                | 0         | 0             |
| <i>CHEK2</i>   | 0                                                 | 0                                                                   | 0                                | 0         | 0             |
| <i>DICER1</i>  | 0                                                 | 0                                                                   | 0                                | 0         | 0             |
| <i>FH</i>      | 0                                                 | 0                                                                   | 0                                | 0         | 0             |
| <i>FLCN</i>    | 0                                                 | 0                                                                   | 0                                | 0         | 0             |
| <i>MLH1</i>    | 0                                                 | 0                                                                   | 0                                | 0         | 0             |
| <i>MSH2</i>    | 0                                                 | 0                                                                   | 0                                | 0         | 0             |
| <i>MSH6</i>    | 0                                                 | 0                                                                   | 0                                | 0         | 0             |
| <i>MUTYH</i>   | 0                                                 | 0                                                                   | 0                                | 0         | 0             |
| <i>NF1</i>     | 1                                                 | 0                                                                   | 0                                | 0         | 0             |
| <i>PALB2</i>   | 0                                                 | 0                                                                   | 0                                | 0         | 0             |
| <i>PMS2</i>    | 0                                                 | 0                                                                   | 0                                | 0         | 0             |
| <i>POLD1</i>   | 0                                                 | 0                                                                   | 0                                | 0         | 0             |
| <i>POLE</i>    | 0                                                 | 0                                                                   | 0                                | 0         | 0             |
| <i>PTCH1</i>   | 0                                                 | 0                                                                   | 0                                | 0         | 0             |
| <i>PTEN</i>    | 0                                                 | 0                                                                   | 0                                | 0         | 0             |
| <i>RAD51C</i>  | 0                                                 | 0                                                                   | 0                                | 0         | 0             |
| <i>RAD51D</i>  | 0                                                 | 0                                                                   | 0                                | 0         | 0             |
| <i>RET</i>     | 3                                                 | 0                                                                   | 3                                | 2         | 1             |
| <i>SDHA</i>    | 0                                                 | 0                                                                   | 0                                | 0         | 0             |
| <i>SDHB</i>    | 0                                                 | 0                                                                   | 0                                | 0         | 0             |
| <i>SDHC</i>    | 0                                                 | 0                                                                   | 0                                | 0         | 0             |
| <i>SMAD3</i>   | 0                                                 | 0                                                                   | 0                                | 0         | 0             |
| <i>SMARCB1</i> | 0                                                 | 0                                                                   | 0                                | 0         | 0             |
| <i>TSC2</i>    | 0                                                 | 0                                                                   | 0                                | 0         | 0             |

Results are presented as n (%) except where indicated.

**Supplementary Table 1j** Suspected constitutional pathogenic variants according to tumor type and gene involved with an indication to genetic testing - GIST

|                | Variants with indication<br>to genetic counseling | Variants with no clinical<br>indication to perform<br>germline test | Variants tested in leukocyte DNA |           |               |
|----------------|---------------------------------------------------|---------------------------------------------------------------------|----------------------------------|-----------|---------------|
|                |                                                   |                                                                     | All variants                     | Confirmed | Not confirmed |
| Gene           | n=2                                               | n=0                                                                 | n=2                              | n=2       | n=0           |
| <i>ATM</i>     | 0                                                 | 0                                                                   | 0                                | 0         | 0             |
| <i>BAP1</i>    | 0                                                 | 0                                                                   | 0                                | 0         | 0             |
| <i>BARD1</i>   | 0                                                 | 0                                                                   | 0                                | 0         | 0             |
| <i>BRCA1</i>   | 0                                                 | 0                                                                   | 0                                | 0         | 0             |
| <i>BRCA2</i>   | 0                                                 | 0                                                                   | 0                                | 0         | 0             |
| <i>BRIP1</i>   | 0                                                 | 0                                                                   | 0                                | 0         | 0             |
| <i>CHEK2</i>   | 0                                                 | 0                                                                   | 0                                | 0         | 0             |
| <i>DICER1</i>  | 0                                                 | 0                                                                   | 0                                | 0         | 0             |
| <i>FH</i>      | 0                                                 | 0                                                                   | 0                                | 0         | 0             |
| <i>FLCN</i>    | 0                                                 | 0                                                                   | 0                                | 0         | 0             |
| <i>MLH1</i>    | 0                                                 | 0                                                                   | 0                                | 0         | 0             |
| <i>MSH2</i>    | 0                                                 | 0                                                                   | 0                                | 0         | 0             |
| <i>MSH6</i>    | 0                                                 | 0                                                                   | 0                                | 0         | 0             |
| <i>MUTYH</i>   | 0                                                 | 0                                                                   | 0                                | 0         | 0             |
| <i>NF1</i>     | 1                                                 | 0                                                                   | 1                                | 1         | 0             |
| <i>PALB2</i>   | 0                                                 | 0                                                                   | 0                                | 0         | 0             |
| <i>PMS2</i>    | 0                                                 | 0                                                                   | 0                                | 0         | 0             |
| <i>POLD1</i>   | 0                                                 | 0                                                                   | 0                                | 0         | 0             |
| <i>POLE</i>    | 0                                                 | 0                                                                   | 0                                | 0         | 0             |
| <i>PTCH1</i>   | 0                                                 | 0                                                                   | 0                                | 0         | 0             |
| <i>PTEN</i>    | 0                                                 | 0                                                                   | 0                                | 0         | 0             |
| <i>RAD51C</i>  | 0                                                 | 0                                                                   | 0                                | 0         | 0             |
| <i>RAD51D</i>  | 0                                                 | 0                                                                   | 0                                | 0         | 0             |
| <i>RET</i>     | 0                                                 | 0                                                                   | 0                                | 0         | 0             |
| <i>SDHA</i>    | 0                                                 | 0                                                                   | 0                                | 0         | 0             |
| <i>SDHB</i>    | 0                                                 | 0                                                                   | 0                                | 0         | 0             |
| <i>SDHC</i>    | 1                                                 | 0                                                                   | 1                                | 1         | 0             |
| <i>SMAD3</i>   | 0                                                 | 0                                                                   | 0                                | 0         | 0             |
| <i>SMARCB1</i> | 0                                                 | 0                                                                   | 0                                | 0         | 0             |
| <i>TSC2</i>    | 0                                                 | 0                                                                   | 0                                | 0         | 0             |

Results are presented as n (%) except where indicated.

**Supplementary Table 1k** Suspected constitutional pathogenic variants according to tumor type and gene involved with an indication to genetic testing - Breast

|                | Variants with indication<br>to genetic counseling | Variants with no clinical<br>indication to perform<br>germline test | Variants tested in leukocyte DNA |           |               |
|----------------|---------------------------------------------------|---------------------------------------------------------------------|----------------------------------|-----------|---------------|
|                |                                                   |                                                                     | All variants                     | Confirmed | Not confirmed |
| Gene           | n=2                                               | n=1                                                                 | n=0                              | n=0       | n=0           |
| <i>ATM</i>     | 0                                                 | 0                                                                   | 0                                | 0         | 0             |
| <i>BAP1</i>    | 0                                                 | 0                                                                   | 0                                | 0         | 0             |
| <i>BARD1</i>   | 0                                                 | 0                                                                   | 0                                | 0         | 0             |
| <i>BRCA1</i>   | 0                                                 | 0                                                                   | 0                                | 0         | 0             |
| <i>BRCA2</i>   | 0                                                 | 0                                                                   | 0                                | 0         | 0             |
| <i>BRIP1</i>   | 0                                                 | 0                                                                   | 0                                | 0         | 0             |
| <i>CHEK2</i>   | 0                                                 | 0                                                                   | 0                                | 0         | 0             |
| <i>DICER1</i>  | 0                                                 | 0                                                                   | 0                                | 0         | 0             |
| <i>FH</i>      | 0                                                 | 0                                                                   | 0                                | 0         | 0             |
| <i>FLCN</i>    | 0                                                 | 0                                                                   | 0                                | 0         | 0             |
| <i>MLH1</i>    | 0                                                 | 0                                                                   | 0                                | 0         | 0             |
| <i>MSH2</i>    | 0                                                 | 0                                                                   | 0                                | 0         | 0             |
| <i>MSH6</i>    | 0                                                 | 0                                                                   | 0                                | 0         | 0             |
| <i>MUTYH</i>   | 0                                                 | 0                                                                   | 0                                | 0         | 0             |
| <i>NF1</i>     | 1                                                 | 1                                                                   | 0                                | 0         | 0             |
| <i>PALB2</i>   | 0                                                 | 0                                                                   | 0                                | 0         | 0             |
| <i>PMS2</i>    | 0                                                 | 0                                                                   | 0                                | 0         | 0             |
| <i>POLD1</i>   | 0                                                 | 0                                                                   | 0                                | 0         | 0             |
| <i>POLE</i>    | 0                                                 | 0                                                                   | 0                                | 0         | 0             |
| <i>PTCH1</i>   | 0                                                 | 0                                                                   | 0                                | 0         | 0             |
| <i>PTEN</i>    | 0                                                 | 0                                                                   | 0                                | 0         | 0             |
| <i>RAD51C</i>  | 1                                                 | 0                                                                   | 0                                | 0         | 0             |
| <i>RAD51D</i>  | 0                                                 | 0                                                                   | 0                                | 0         | 0             |
| <i>RET</i>     | 0                                                 | 0                                                                   | 0                                | 0         | 0             |
| <i>SDHA</i>    | 0                                                 | 0                                                                   | 0                                | 0         | 0             |
| <i>SDHB</i>    | 0                                                 | 0                                                                   | 0                                | 0         | 0             |
| <i>SDHC</i>    | 0                                                 | 0                                                                   | 0                                | 0         | 0             |
| <i>SMAD3</i>   | 0                                                 | 0                                                                   | 0                                | 0         | 0             |
| <i>SMARCB1</i> | 0                                                 | 0                                                                   | 0                                | 0         | 0             |
| <i>TSC2</i>    | 0                                                 | 0                                                                   | 0                                | 0         | 0             |

Results are presented as n (%) except where indicated.

**Supplementary Table 2** – Constitutional pathogenic variants detected by additional constitutional testing and/or not fulfilling ESMO criteria

| Disease                                   | ID patient | Additional variant #1           | Additional variant #2          |
|-------------------------------------------|------------|---------------------------------|--------------------------------|
| Primary malignant neoplasm of ovary       | 1          | BRCA1: deletion of exons 18-19  |                                |
| Primary malignant neoplasm of ovary       | 2          | CHEK2: c.433C>T - p.Arg145Trp   |                                |
| Endometrial carcinoma                     | 3          | MSH2: Exon 16 deletion          |                                |
| Primary malignant neoplasm of pancreas    | 4          | BRCA1: deletion of exons 1-2    |                                |
| Endometrial carcinoma                     | 5          | MSH2: c.2231T>C - (p.Leu744Ser) |                                |
| Primary malignant adenocarcinoma of colon | 6          | MSH2: c.942+2T>A - p.?          |                                |
| Primary malignant neoplasm of ovary       | 7          | RAD51C: c.904+5G>T              |                                |
| Endometrial carcinoma                     | 8          | MLH1: c.588+5G>T - p.?          |                                |
| Endometrioid carcinoma of ovary           | 9          | MSH6: c.3261dup - p.Phe1088fs   |                                |
| Primary malignant neoplasm of ovary       | 10         | BRCA1: deletion of exons 4-7    |                                |
| Primary malignant neoplasm of ovary       | 11         | RAD51C: c.904+5G>T              |                                |
| Primary malignant neoplasm of ovary       | 12         | RAD51C: c.904+5G>T              |                                |
| Endometrioid carcinoma of ovary           | 13         | MSH6: c.3261dup - p.Phe1088fs   |                                |
| Endometrial carcinoma                     | 14         | MSH2: c.2647dup - p.Ile883fs    |                                |
| Primary malignant neoplasm of ovary       | 15         | BRCA1: deletion of exons 21-22  | CDKN2A: c.301G>T - p.Gly101Trp |
| Primary malignant neoplasm of ovary       | 16         | BRCA1: deletion of exons 1-2    |                                |
| Primary malignant neoplasm of ovary       | 17         | BRCA1: deletion of exons 17-18  |                                |
