# Supplementary figures and images for: Germline pathogenic variants identification through Comprehensive Cancer Genome Profiling
Source: Research Square preprint supplement (doi:10.21203/rs.3.rs-8088663/v1), 2025-12-08

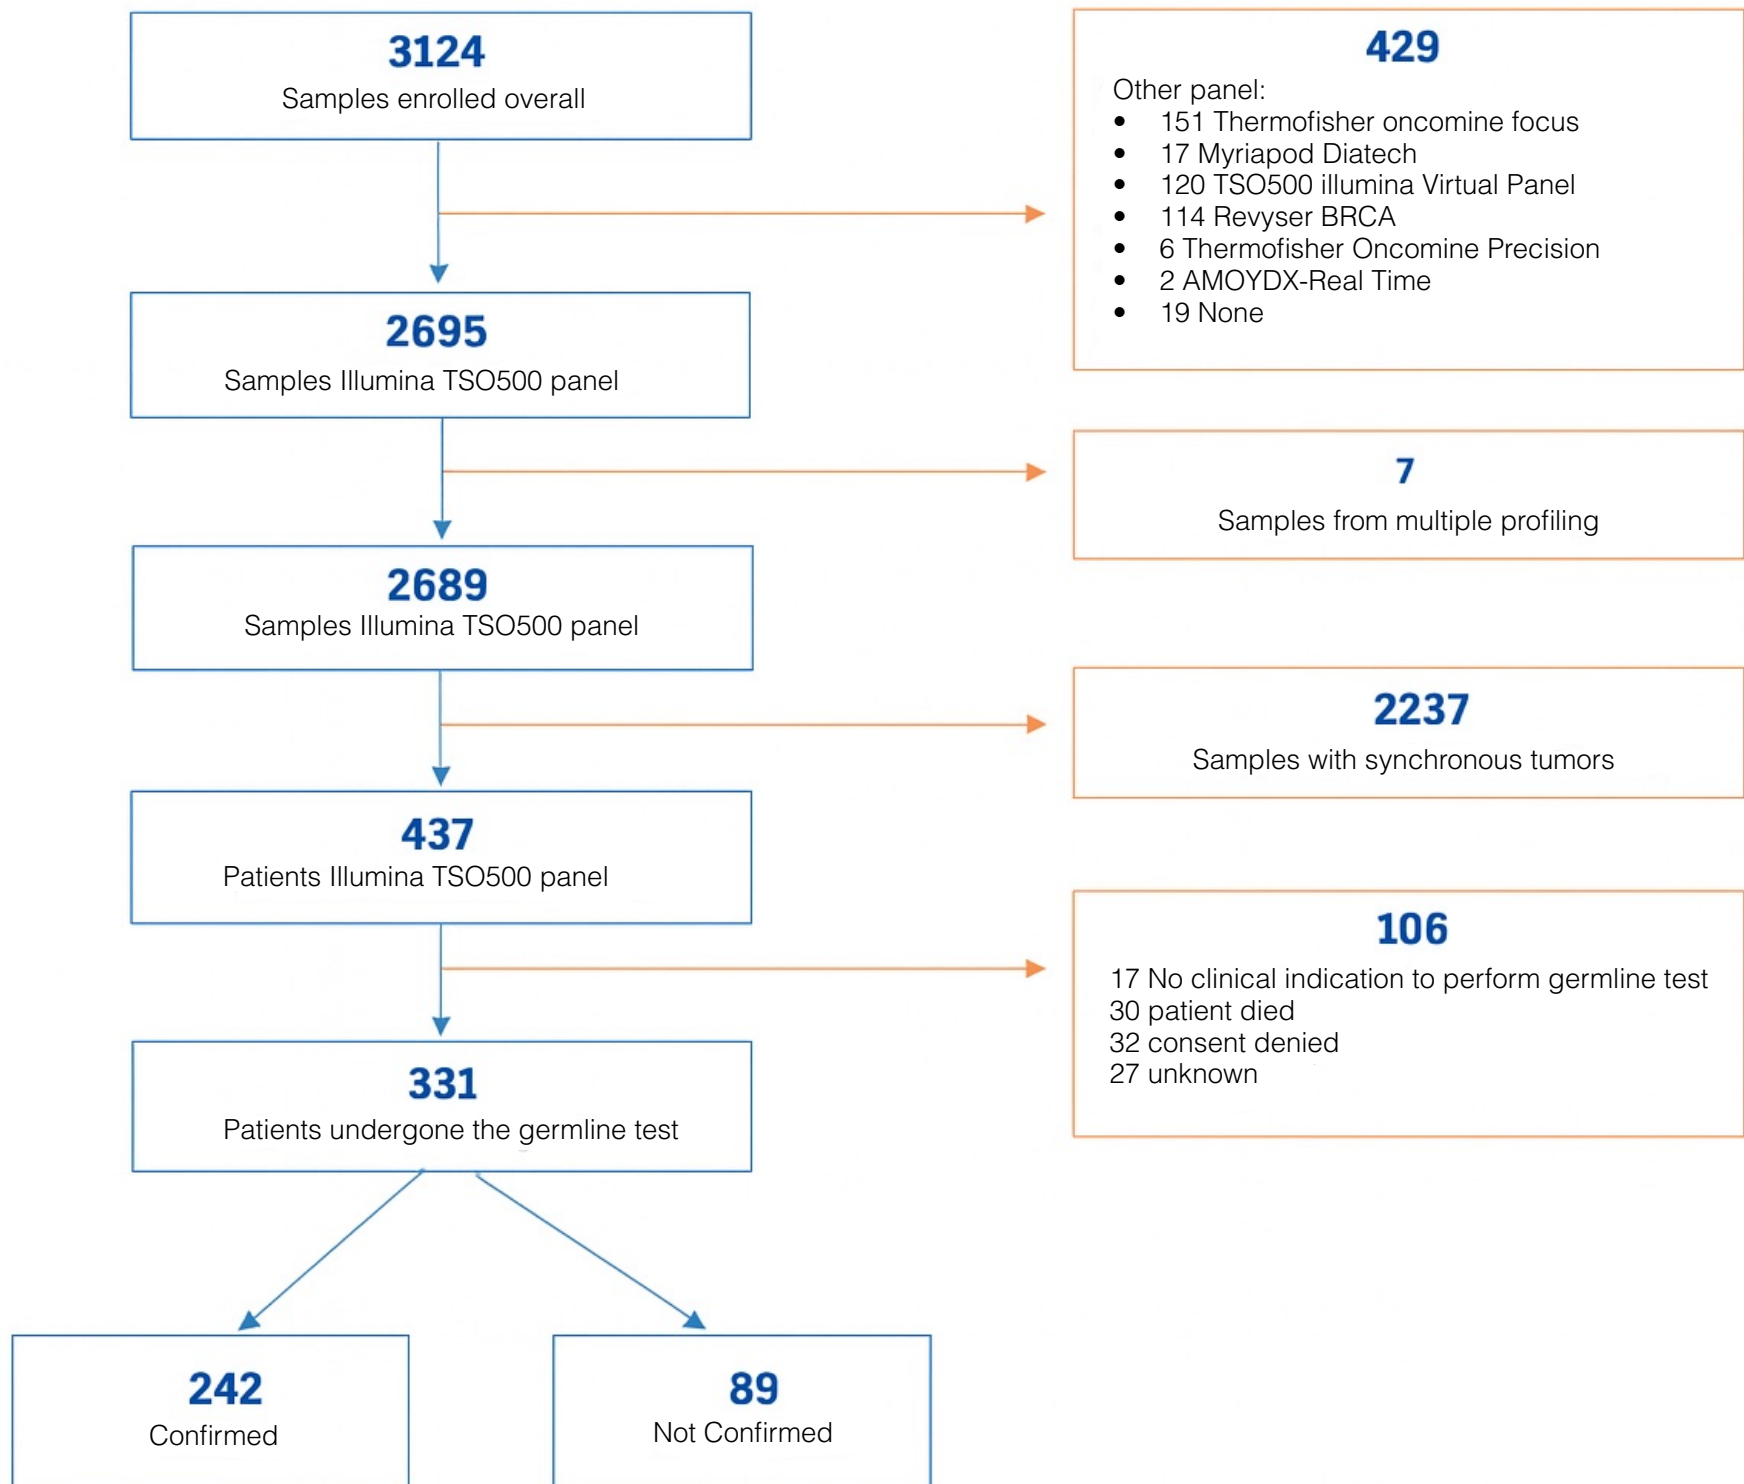

Supplement: Supplementary file 1 [file 11e4152b8a32ee3bb936e977.pdf]
